# Supplementary material
Source: MDPI journal article supplement (https://www.mdpi.com/2073-4395/6/2/34)
Supplement: s1 [file s1]

Communication

# **Supplementary figures for *Effect of Irrigation Timing on Root Zone Soil Temperature, Root Growth and Grain Yield and Chemical Composition in Corn***

**Xuejun Dong <sup>1,\*</sup>, Wenwei Xu <sup>2</sup>, Yongjiang Zhang <sup>3</sup>, and Daniel I. Leskovar <sup>1</sup>**

<sup>1</sup> Texas A&M AgriLife Research – Uvalde, 1619 Garner Field Road, Uvalde, Texas 78801, USA

<sup>2</sup> Texas A&M AgriLife Research – Lubbock, 1102 East FM 1294, Lubbock, Texas 79403, USA

<sup>3</sup> College of Agronomy, Agricultural University of Hebei, 2596 Lekai South St., Baoding, Hebei Province, 071000, China

\* xuejun.dong@ag.tamu.edu, +01-830-278-9151

Version May 17, 2016 submitted to Agronomy; Typeset by L<sup>A</sup>T<sub>E</sub>X using class file mdpi.cls

---

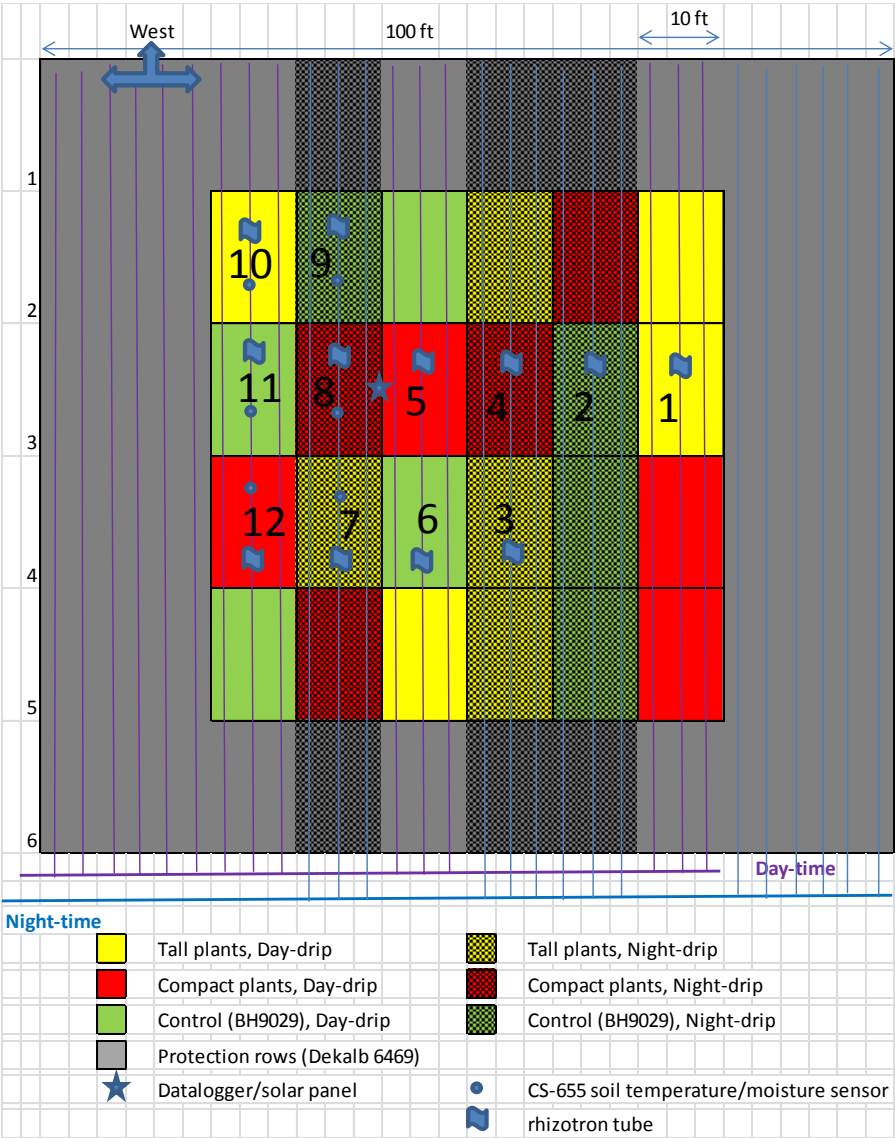

**Supplementary Materials Figure S1:** Drip-irrigated corn plot layout, showing 24 plots ( $3 \times 6 \text{ m}^2$  each) under day-time vs. night-time irrigation. Rhizotron tubes were installed in 12 plots (numbered) and soil temperature sensors (CS-655) were installed in 6 plots and recorded with a CR1000 datalogger (blue dots).

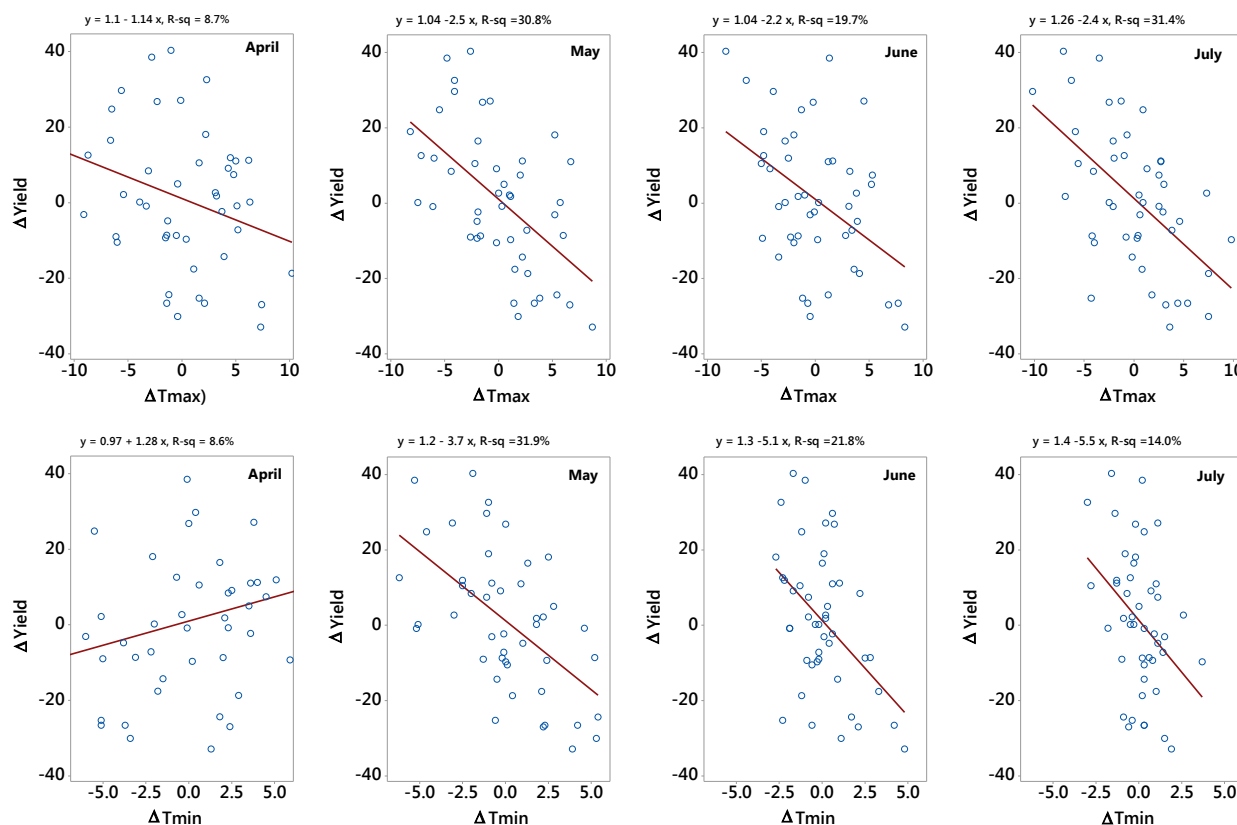

**Supplementary Materials Figure S2:** Scatter plots of first-differences of corn yield (bu/ac) and first-differences of monthly maximum and minimum temperatures from April to July in Uvalde County, Texas in 47 years (1968-2015; yield data missing in 2014). The first difference was calculated as the difference between temperatures (or yields) between two consecutive years within the 47-year time series (shown as  $\Delta$  in figure). Also shown are best-fit linear regression lines and associated regression parameters. Historical weather data were obtained from National Climatic Data Center (<http://www.ncdc.noaa.gov/cag/time-series/us>) and corn yield data from USDA - National Agricultural Statistics Service (<http://quickstats.nass.usda.gov/>).
